# Supplementary material
Source: PubMed Central journal article supplement (PMC5890432)

Supplementary Figure 1

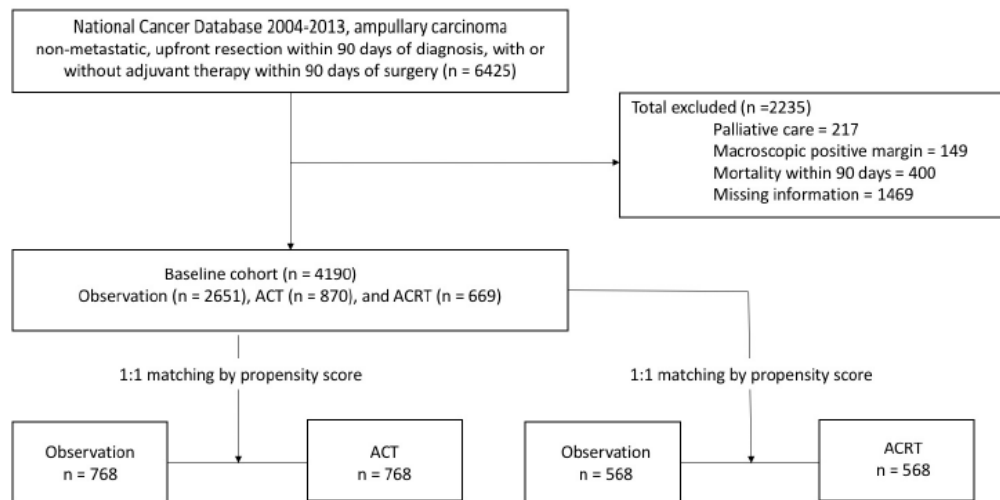

Supplement: NIHMS919731-supplement-11605_2017_3624_MOESM1_ESM.pdf [file NIHMS919731-supplement-11605_2017_3624_MOESM1_ESM.pdf]

Supplementary Figure 2

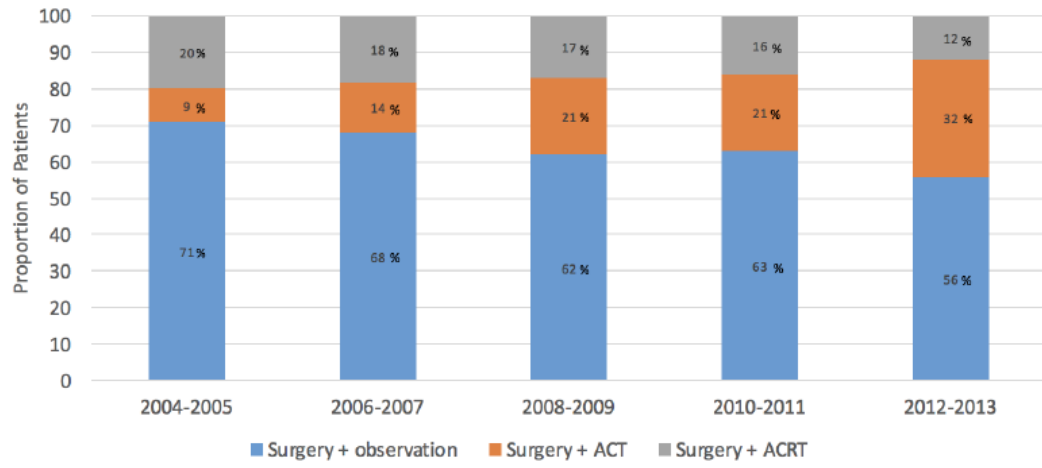

Supplement: NIHMS919731-supplement-11605_2017_3624_MOESM2_ESM.pdf [file NIHMS919731-supplement-11605_2017_3624_MOESM2_ESM.pdf]
